# Supplementary material for: Attitudes of undergraduate university women towards HPV vaccination: a cross-sectional study in Ottawa, Canada
Source: Springer Nature journal article supplement (doi:10.1186/s12905-018-0622-0), 2018-08-02
Supplement: MOESM2 [file 15997084]

## French Questionnaire

Ce sondage vise à récolter vos opinions et vos perceptions sur la vaccination contre le virus du papillome humain (VPH). Vous pouvez remplir ce sondage que vous ayez reçu ou non le vaccin contre le VPH. S'il vous, veuillez répondre le plus honnêtement possible.

Le VPH est un virus qui cause une variété de maladies génitales. De plus, ce virus est la cause principale du cancer du col de l'utérus, l'un des cancers les plus répandus chez les femmes dans le monde entier. Le test de Papanicolaou, généralement connu comme un test de Pap, est utilisé pour détecter les anomalies du col de l'utérus et des lésions associées avec le cancer.

1) Êtes-vous une femme ou un homme?

- Femme
- Homme

2) Êtes-vous vaccinée avec au moins une dose du vaccin contre le VPH?

- Oui
- Non

3) Combien doses du vaccin contre le VPH avez-vous reçu?

- 1
- 2
- 3
- 4 ou plus
- Je ne suis pas certaine

### Section 1a : Attitudes au sujet des vaccins contre le VPH et recevoir ce vaccin

*Cette section porte sur vos opinions par rapport à la vaccination contre le VPH. Même si les questions ont l'air d'être similaires, veuillez répondre à chacune d'entre elles. La plupart des questions ci-dessous ont été développées sur une échelle de 7 points. Pour chaque question, indiquer le numéro dont qui correspond le plus à vos opinions ou vos croyances.*

4) D'après moi, recevoir la vaccination contre le VPH était...

|             |   |   |   |   |   |   |   |            |
|-------------|---|---|---|---|---|---|---|------------|
| Bénéfique   | 1 | 2 | 3 | 4 | 5 | 6 | 7 | Nuisible   |
| Indésirable | 1 | 2 | 3 | 4 | 5 | 6 | 7 | Désirable  |
| Bonne       | 1 | 2 | 3 | 4 | 5 | 6 | 7 | Mauvaise   |
| Inutile     | 1 | 2 | 3 | 4 | 5 | 6 | 7 | Utile      |
| Efficace    | 1 | 2 | 3 | 4 | 5 | 6 | 7 | Inefficace |

5) Recevoir le vaccin contre le VPH a réduit mon risque de développer des verrues génitales....

|               |   |   |   |   |   |   |   |              |
|---------------|---|---|---|---|---|---|---|--------------|
| Très probable | 1 | 2 | 3 | 4 | 5 | 6 | 7 | Peu probable |
|---------------|---|---|---|---|---|---|---|--------------|

6) Réduire mon risque de développer les verrues génitales est....

|             |   |   |   |   |   |   |   |           |
|-------------|---|---|---|---|---|---|---|-----------|
| Bénéfique   | 1 | 2 | 3 | 4 | 5 | 6 | 7 | Nuisible  |
| Indésirable | 1 | 2 | 3 | 4 | 5 | 6 | 7 | Désirable |
| Bon         | 1 | 2 | 3 | 4 | 5 | 6 | 7 | Mauvais   |

7) Recevoir le vaccin contre le VPH a réduit mon risque de développer le cancer du col de l'utérus...

Très probable      1      2      3      4      5      6      7      Peu probable

8) Réduire mon risque de développer le cancer du col de l'utérus est...

|             |   |   |   |   |   |   |   |           |
|-------------|---|---|---|---|---|---|---|-----------|
| Bénéfique   | 1 | 2 | 3 | 4 | 5 | 6 | 7 | Nuisible  |
| Indésirable | 1 | 2 | 3 | 4 | 5 | 6 | 7 | Désirable |
| Bon         | 1 | 2 | 3 | 4 | 5 | 6 | 7 | Mauvais   |

9) Recevoir le vaccin contre le VPH a réduit la nécessité d'avoir un test de dépistage pour le cancer du col de l'utérus...

Très probable      1      2      3      4      5      6      7      Peu probable

10) Le dépistage du cancer du col de l'utérus est...

|             |   |   |   |   |   |   |   |           |
|-------------|---|---|---|---|---|---|---|-----------|
| Bénéfique   | 1 | 2 | 3 | 4 | 5 | 6 | 7 | Nuisible  |
| Indésirable | 1 | 2 | 3 | 4 | 5 | 6 | 7 | Désirable |
| Bon         | 1 | 2 | 3 | 4 | 5 | 6 | 7 | Mauvais   |

11) La vaccination de toutes les filles/femmes contre le VPH, si elles ne sont pas sexuellement actives, est...

|             |   |   |   |   |   |   |   |                |
|-------------|---|---|---|---|---|---|---|----------------|
| Bénéfique   | 1 | 2 | 3 | 4 | 5 | 6 | 7 | Nuisible       |
| Indésirable | 1 | 2 | 3 | 4 | 5 | 6 | 7 | Désirable      |
| Bonne       | 1 | 2 | 3 | 4 | 5 | 6 | 7 | Mauvaise       |
| Importante  | 1 | 2 | 3 | 4 | 5 | 6 | 7 | Non importante |

12) La vaccination de toutes les filles/femmes contre le VPH, si elles sont sexuellement actives, est...

|             |   |   |   |   |   |   |   |                |
|-------------|---|---|---|---|---|---|---|----------------|
| Bénéfique   | 1 | 2 | 3 | 4 | 5 | 6 | 7 | Nuisible       |
| Indésirable | 1 | 2 | 3 | 4 | 5 | 6 | 7 | Désirable      |
| Bonne       | 1 | 2 | 3 | 4 | 5 | 6 | 7 | Mauvaise       |
| Importante  | 1 | 2 | 3 | 4 | 5 | 6 | 7 | Non importante |

13) J'ai l'intention de finir la série des vaccins contre le VPH

- Oui, conformément à l'horaire indiqué pour la série.
- Oui, mais je le ferai en plus de temps qu'indiqué pour la série de vaccins.
- J'ai déjà reçu toutes les doses de vaccin.
- Non (Raison(s): \_\_\_\_\_ )

14) SVP indiquez à quel point vous êtes d'accord avec les déclarations suivantes.

a) Recevoir le vaccin contre le VPH a changé mes intentions de recevoir ou non un test de dépistage du cancer du col de l'utérus.

Fermement en accord      1      2      3      4      5      Fermement en désaccord

b) J'ai l'intention de recevoir un test de dépistage du cancer du col de l'utérus.

Fermement en accord      1      2      3      4      5      Fermement en désaccord

c) Le vaccin contre le VPH n'a pas affecté ma décision concernant le dépistage du cancer du col de l'utérus.

Fermement en accord      1      2      3      4      5      Fermement en désaccord

## Section 2a : Motivations et obstacles

Dans cette section, nous vous demandons ce qui a influencé votre décision de recevoir le vaccin contre le VPH.

15) Si vous AVEZ reçu au moins une dose du vaccin contre le VPH, indiquez à quel point chacun de ces facteurs suivants a influencé votre décision.

|                                                                                    |               |                 |        |                   |                      |     |
|------------------------------------------------------------------------------------|---------------|-----------------|--------|-------------------|----------------------|-----|
| Mon médecin me l'a recommandé.                                                     | Très influent | Un peu influent | Neutre | Pas très influent | Pas du tout influent | N/A |
| J'ai vu une (plusieurs) publicité(s) pour le vaccin.                               | Très influent | Un peu influent | Neutre | Pas très influent | Pas du tout influent | N/A |
| Une (des) amie(s) a (ont) reçu le vaccin ou avait(ent) l'intention de le recevoir. | Très influent | Un peu influent | Neutre | Pas très influent | Pas du tout influent | N/A |
| Je pense que je suis sujette à une infection de VPH                                | Très influent | Un peu influent | Neutre | Pas très influent | Pas du tout influent | N/A |
| Il y a des antécédents d'anomalies du col de l'utérus dans ma famille.             | Très influent | Un peu influent | Neutre | Pas très influent | Pas du tout influent | N/A |
| Je connais quelqu'un qui a/avait le cancer du col de l'utérus.                     | Très influent | Un peu influent | Neutre | Pas très influent | Pas du tout influent | N/A |
| Mes parents me l'ont recommandé.                                                   | Très influent | Un peu influent | Neutre | Pas très influent | Pas du tout influent | N/A |
| Mon (mes) amie(s) me l'a (ont) recommandé.                                         | Très influent | Un peu influent | Neutre | Pas très influent | Pas du tout influent | N/A |
| Le vaccin était couvert par mon assurance maladie.                                 | Très influent | Un peu influent | Neutre | Pas très influent | Pas du tout influent | N/A |
| Le vaccin m'était offert à l'école (primaire, secondaire).                         | Très influent | Un peu influent | Neutre | Pas très influent | Pas du tout influent | N/A |
| La plupart des filles/femmes mon âge recevait le vaccin.                           | Très influent | Un peu influent | Neutre | Pas très influent | Pas du tout influent | N/A |

16) Si vous AVEZ reçu au moins une dose du vaccin contre le VPH, veuillez indiquer à quel point les avantages potentiels suivants à la vaccination contre le VPH ont influencé votre décision de recevoir ce vaccin.

|                                                                                      |               |                 |        |                   |                      |     |
|--------------------------------------------------------------------------------------|---------------|-----------------|--------|-------------------|----------------------|-----|
| Le vaccin pourrait me protéger contre une infection de VPH.                          | Très influent | Un peu influent | Neutre | Pas très influent | Pas du tout influent | N/A |
| Le vaccin pourrait me protéger contre le développement des verrues génitales.        | Très influent | Un peu influent | Neutre | Pas très influent | Pas du tout influent | N/A |
| Le vaccin pourrait me protéger contre le développement du cancer du col de l'utérus. | Très influent | Un peu influent | Neutre | Pas très influent | Pas du tout influent | N/A |

### Section 1b : Attitudes au sujet des vaccins contre le VPH et l'administration du vaccin

Cette section vous demande vos opinions par rapport à la vaccination contre le VPH. Même si les questions ont l'air d'être similaires, veuillez répondre à chacune d'entre elles. La plupart des questions ci-dessous ont été développées sur une échelle de 7 points. Pour chaque question, indiquer le numéro dont qui correspond le plus à vos opinions ou vos croyances.

17) D'après moi, recevoir la vaccination contre le VPH serait...

|             |   |   |   |   |   |   |   |            |
|-------------|---|---|---|---|---|---|---|------------|
| Bénéfique   | 1 | 2 | 3 | 4 | 5 | 6 | 7 | Nuisible   |
| Indésirable | 1 | 2 | 3 | 4 | 5 | 6 | 7 | Désirable  |
| Bonne       | 1 | 2 | 3 | 4 | 5 | 6 | 7 | Mauvaise   |
| Inutile     | 1 | 2 | 3 | 4 | 5 | 6 | 7 | Utile      |
| Efficace    | 1 | 2 | 3 | 4 | 5 | 6 | 7 | Inefficace |

18) Recevoir le vaccin contre le VPH réduira mon risque de développer des verrues génitales...

|               |   |   |   |   |   |   |   |              |
|---------------|---|---|---|---|---|---|---|--------------|
| Très probable | 1 | 2 | 3 | 4 | 5 | 6 | 7 | Peu probable |
|---------------|---|---|---|---|---|---|---|--------------|

19) Réduire mon risque de développer les verrues génitales est....

|             |   |   |   |   |   |   |   |           |
|-------------|---|---|---|---|---|---|---|-----------|
| Bénéfique   | 1 | 2 | 3 | 4 | 5 | 6 | 7 | Nuisible  |
| Indésirable | 1 | 2 | 3 | 4 | 5 | 6 | 7 | Désirable |
| Bon         | 1 | 2 | 3 | 4 | 5 | 6 | 7 | Mauvais   |

20) Recevoir le vaccin contre le VPH réduira mon risque de développer le cancer du col de l'utérus...

|               |   |   |   |   |   |   |   |              |
|---------------|---|---|---|---|---|---|---|--------------|
| Très probable | 1 | 2 | 3 | 4 | 5 | 6 | 7 | Peu probable |
|---------------|---|---|---|---|---|---|---|--------------|

21) Réduire mon risque de développer le cancer du col de l'utérus est...

|             |   |   |   |   |   |   |   |           |
|-------------|---|---|---|---|---|---|---|-----------|
| Bénéfique   | 1 | 2 | 3 | 4 | 5 | 6 | 7 | Nuisible  |
| Indésirable | 1 | 2 | 3 | 4 | 5 | 6 | 7 | Désirable |
| Bon         | 1 | 2 | 3 | 4 | 5 | 6 | 7 | Mauvais   |

22) Recevoir le vaccin contre le VPH réduira la nécessité d'avoir un test de dépistage pour le cancer du col de l'utérus...

|               |   |   |   |   |   |   |   |              |
|---------------|---|---|---|---|---|---|---|--------------|
| Très probable | 1 | 2 | 3 | 4 | 5 | 6 | 7 | Peu probable |
|---------------|---|---|---|---|---|---|---|--------------|

23) Le dépistage du cancer du col de l'utérus est...

|             |   |   |   |   |   |   |   |           |
|-------------|---|---|---|---|---|---|---|-----------|
| Bénéfique   | 1 | 2 | 3 | 4 | 5 | 6 | 7 | Nuisible  |
| Indésirable | 1 | 2 | 3 | 4 | 5 | 6 | 7 | Désirable |
| Bon         | 1 | 2 | 3 | 4 | 5 | 6 | 7 | Mauvais   |

24) La vaccination de toutes les filles/femmes contre le VPH, si elles ne sont pas sexuellement actives, est...

|             |   |   |   |   |   |   |   |                |
|-------------|---|---|---|---|---|---|---|----------------|
| Bénéfique   | 1 | 2 | 3 | 4 | 5 | 6 | 7 | Nuisible       |
| Indésirable | 1 | 2 | 3 | 4 | 5 | 6 | 7 | Désirable      |
| Bonne       | 1 | 2 | 3 | 4 | 5 | 6 | 7 | Mauvaise       |
| Importante  | 1 | 2 | 3 | 4 | 5 | 6 | 7 | Non importante |

25) La vaccination de toutes les filles/femmes contre le VPH, si elles sont sexuellement actives, est...

|             |   |   |   |   |   |   |   |                |
|-------------|---|---|---|---|---|---|---|----------------|
| Bénéfique   | 1 | 2 | 3 | 4 | 5 | 6 | 7 | Nuisible       |
| Indésirable | 1 | 2 | 3 | 4 | 5 | 6 | 7 | Désirable      |
| Bonne       | 1 | 2 | 3 | 4 | 5 | 6 | 7 | Mauvaise       |
| Importante  | 1 | 2 | 3 | 4 | 5 | 6 | 7 | Non importante |

26) SVP indiquez à quel point vous êtes d'accord avec les déclarations suivantes.

a) J'ai l'intention de recevoir le vaccin contre le VPH durant les prochains 12 mois.

Fermement en accord      1      2      3      4      5      Fermement en désaccord

b) Je n'ai pas l'intention de recevoir le vaccin contre le VPH.

Fermement en accord      1      2      3      4      5      Fermement en désaccord

c) J'envisage de recevoir le vaccin contre le VPH à un moment.

Fermement en accord      1      2      3      4      5      Fermement en désaccord

27) SVP indiquez à quel point vous êtes d'accord avec les déclarations suivantes.

a) Recevoir le vaccin contre le VPH changera mes intentions envers le dépistage du cancer du col de l'utérus.

Fermement en accord      1      2      3      4      5      Fermement en désaccord

b) J'ai l'intention de recevoir un est de dépistage du cancer du col de l'utérus.

Fermement en accord      1      2      3      4      5      Fermement en désaccord

c) Le vaccin contre le VPH n'affectera pas ma décision envers le dépistage du cancer du col de l'utérus.

Fermement en accord      1      2      3      4      5      Fermement en désaccord

## Section 2b : Motivations et obstacles

Dans cette section, nous vous demandons ce qui a influencé votre décision de recevoir le vaccin contre le VPH.

28) Si vous N'AVEZ PAS reçu au moins une dose du vaccin contre le VPH, indiquez à quel point chacun des facteurs suivants a influencé votre décision.

|                                                                                     |               |                 |        |                   |                      |     |
|-------------------------------------------------------------------------------------|---------------|-----------------|--------|-------------------|----------------------|-----|
| Je n'ai jamais entendu parler du vaccin.                                            | Très influent | Un peu influent | Neutre | Pas très influent | Pas du tout influent | N/A |
| Je ne sais pas où ce vaccin est offert.                                             | Très influent | Un peu influent | Neutre | Pas très influent | Pas du tout influent | N/A |
| Le vaccin est trop cher.                                                            | Très influent | Un peu influent | Neutre | Pas très influent | Pas du tout influent | N/A |
| Le vaccin n'est pas couvert par mon assurance de maladie.                           | Très influent | Un peu influent | Neutre | Pas très influent | Pas du tout influent | N/A |
| Je suis dans une relation monogame alors je n'ai pas besoin ce vaccin.              | Très influent | Un peu influent | Neutre | Pas très influent | Pas du tout influent | N/A |
| En ce moment je ne suis pas sexuellement active alors je n'ai pas besoin ce vaccin. | Très influent | Un peu influent | Neutre | Pas très influent | Pas du tout influent | N/A |
| Mes parents ne veulent pas que je reçois ce vaccin.                                 | Très influent | Un peu influent | Neutre | Pas très influent | Pas du tout influent | N/A |
| Je n'en connais pas assez sur ce vaccin.                                            | Très influent | Un peu influent | Neutre | Pas très influent | Pas du tout influent | N/A |
| Je n'en connais pas assez sure les effets secondaires potentiels de ce vaccin.      | Très influent | Un peu influent | Neutre | Pas très influent | Pas du tout influent | N/A |
| Je ne sais pas si ce vaccin fonctionne.                                             | Très influent | Un peu influent | Neutre | Pas très influent | Pas du tout influent | N/A |
| J'ai peur que le vaccin me fasse mal.                                               | Très influent | Un peu influent | Neutre | Pas très influent | Pas du tout influent | N/A |
| J'ai déjà le VPH.                                                                   | Très influent | Un peu influent | Neutre | Pas très influent | Pas du tout influent | N/A |

29) Si vous N'AVEZ PAS reçu au moins une dose du vaccin contre le VPH, indiquez à quel point chacun des facteurs suivants influencera votre décision.

|                                                                                      |               |                 |        |                   |                      |     |
|--------------------------------------------------------------------------------------|---------------|-----------------|--------|-------------------|----------------------|-----|
| Mon médecin me l'a recommandé.                                                       | Très influent | Un peu influent | Neutre | Pas très influent | Pas du tout influent | N/A |
| J'ai vu une (plusieurs) publicité(s) pour le vaccin.                                 | Très influent | Un peu influent | Neutre | Pas très influent | Pas du tout influent | N/A |
| Une (des) amie(s) a (ont) reçu le vaccin ou avait(ent) l'intention de le recevoir.   | Très influent | Un peu influent | Neutre | Pas très influent | Pas du tout influent | N/A |
| Je pense que je suis sujette à une infection de VPH.                                 | Très influent | Un peu influent | Neutre | Pas très influent | Pas du tout influent | N/A |
| Il y a des antécédents d'anomalies du col de l'utérus dans ma famille.               | Très influent | Un peu influent | Neutre | Pas très influent | Pas du tout influent | N/A |
| Je connais quelqu'un qui a/avait le cancer du col de l'utérus.                       | Très influent | Un peu influent | Neutre | Pas très influent | Pas du tout influent | N/A |
| Mes parents me l'ont recommandé.                                                     | Très influent | Un peu influent | Neutre | Pas très influent | Pas du tout influent | N/A |
| Mon (mes) amie(s) me l'a(ont) recommandé.                                            | Très influent | Un peu influent | Neutre | Pas très influent | Pas du tout influent | N/A |
| Le vaccin était couvert par mon assurance maladie.                                   | Très influent | Un peu influent | Neutre | Pas très influent | Pas du tout influent | N/A |
| Le vaccin m'était offert à l'école (primaire, secondaire).                           | Très influent | Un peu influent | Neutre | Pas très influent | Pas du tout influent | N/A |
| Le coût du vaccin.                                                                   | Très influent | Un peu influent | Neutre | Pas très influent | Pas du tout influent | N/A |
| La plupart des filles/femmes mon âge recevait le vaccin.                             | Très influent | Un peu influent | Neutre | Pas très influent | Pas du tout influent | N/A |
| Le vaccin pourrait me protéger contre une infection par le VPH                       | Très influent | Un peu influent | Neutre | Pas très influent | Pas du tout influent | N/A |
| Le vaccin pourrait me protéger contre le développement des verrues génitales.        | Très influent | Un peu influent | Neutre | Pas très influent | Pas du tout influent | N/A |
| Le vaccin pourrait me protéger contre le développement du cancer du col de l'utérus. | Très influent | Un peu influent | Neutre | Pas très influent | Pas du tout influent | N/A |

30) Si votre assurance maladie ne le couvrait pas, quel serait le coût maximal que vous pourriez à payer pour la série de vaccins contre le VPH?

- 0\$
- Plus que 0\$ mais moins ou égalé à 100\$
- 200\$
- 300\$
- 400\$
- Plus que ou égalé à 500\$
- Je ne recevrai pas le vaccin.



### Section 3 : L'acceptabilité du vaccin et la pratique des rapports sexuels sans risque

Dans cette section, nous voulons savoir comment ce vaccin pourra changer votre future santé et vos rapports sexuels sans risque.

31) Recevoir le vaccin contre le VPH me porte/ me portera moins à recevoir des tests de Papanicolaou.

- Fermement en accord
- En accord
- Neutre
- En désaccord
- Fermement en désaccord

32) En supposant que vous avez reçu ou que vous étiez prête à recevoir le vaccin contre le VPH, SVP indiquez à quel point vous êtes en accord ou en désaccord avec les affirmations suivantes, au sujet des rapports sexuels sans risque. Complétez la déclaration :

“Après avoir reçu le vaccin contre le VPH \_\_\_\_\_”

|                                                                                                                      |                     |           |        |              |                        |
|----------------------------------------------------------------------------------------------------------------------|---------------------|-----------|--------|--------------|------------------------|
| Je pense que l'utilisation d'un condom durant les relations sexuelles est moins nécessaire.                          | Fermement en accord | En accord | Neutre | En désaccord | Fermement en désaccord |
| Je pense que c'est tout aussi important d'avoir le moins de partenaires sexuels possible.                            | Fermement en accord | En accord | Neutre | En désaccord | Fermement en désaccord |
| Je pense que c'est moins important de parler avec mes partenaires sexuels au sujet des rapports sexuels sans risque. | Fermement en accord | En accord | Neutre | En désaccord | Fermement en désaccord |
| Je pense que c'est tout aussi important d'utiliser un condom à chaque rapport sexuel.                                | Fermement en accord | En accord | Neutre | En désaccord | Fermement en désaccord |
| Je m'inquiéterai moins des rapports sexuels non-protégés.                                                            | Fermement en accord | En accord | Neutre | En désaccord | Fermement en désaccord |

33) Est-ce que recevoir le vaccin contre le VPH a affecté/affectera combien de fois vous utiliserez une sorte de contrôle des naissances ou de la contraception durant les rapports sexuels, comparé à avant de recevoir le vaccin?

- Oui, je l'utiliserai plus souvent.
- Oui, je l'utiliserai moins souvent.
- Non, je ne changerai pas la fréquence avec laquelle j'utilise le contrôle des naissances/contraception.
- Je ne sais pas.
- N/A

#### Section 4 : Connaissance du VPH et du cancer du col de l'utérus

Il y a 2 vaccins différents contre le VPH qui sont disponible pour les femmes. Ces deux vaccins, Gardasil® et Cervarix®, fournissent une protection contre les souches les plus communes du VPH causant le cancer du col de l'utérus. De plus, Gardasil® protège contre deux autres souches du VPH qui causent seulement des verrues génitales.

*Dans cette section, nous voulons savoir si vous êtes au courant de certains faits concernant VPH et du cancer du col de l'utérus.*

34) Indiquez si vous pensez que les déclarations suivantes sont vraies ou fausses.

|                                                                                                           |      |      |
|-----------------------------------------------------------------------------------------------------------|------|------|
| Le VPH est principalement transmis de manière sexuelle.                                                   | Vrai | Faux |
| Le VPH est la plus commune des IST (infections sexuellement transmissibles).                              | Vrai | Faux |
| Le VPH affecte seulement les femmes.                                                                      | Vrai | Faux |
| La plupart des personnes infectées avec le VPH ne démontre pas de signes ou de symptômes d'une infection. | Vrai | Faux |
| La vaccination contre le VPH est seulement efficace si vous n'êtes pas sexuellement active.               | Vrai | Faux |
| Le taux le plus élevé des infections au VPH est chez les adultes de <25 ans.                              | Vrai | Faux |
| Une infection avec le VPH peut causer le cancer du col de l'utérus.                                       | Vrai | Faux |
| 3 doses du vaccin contre le VPH sont requises pour vous assurer de la protection complète.                | Vrai | Faux |
| Au moins 1 femme sur 2 est diagnostiquée avec le VPH durant sa vie.                                       | Vrai | Faux |
| La vaccination contre le VPH vous protège contre toutes les infections reliées au VPH.                    | Vrai | Faux |
| Le signe le plus commun d'une infection de VPH est la présence de verrues génitales.                      | Vrai | Faux |
| La vaccination contre le VPH est efficace seulement pour les femmes.                                      | Vrai | Faux |
| L'infection avec le VPH est associée avec plusieurs types de cancers.                                     | Vrai | Faux |
| 2 souches du VPH expliquent 70% des cancers du col de l'utérus.                                           | Vrai | Faux |
| Le VPH est la seule cause établie du cancer du col de l'utérus.                                           | Vrai | Faux |
| Les tests de Pap ne sont pas nécessaires si les femmes sont vaccinées contre le VPH.                      | Vrai | Faux |

35) Avant aujourd'hui, étiez-vous au courant qu'il avait des vaccins disponibles qui pouvaient prévenir le cancer du col de l'utérus et d'autres infections associées avec le VPH?

- Oui
- Non

36) Avant aujourd'hui, étiez-vous au courant qu'il avait 2 vaccins différents disponibles contre le VPH?

- Oui
- Non

## Section 5 : Données démographiques

*Dans cette dernière section, nous voulons savoir un peu plus sur vous.*

37) Dans quelle faculté étudiez-vous?

- Arts
- Sciences
- Génie
- Sciences de la santé
- Autre (SVP spécifiez : \_\_\_\_\_ )

38) Quel âge avez-vous?

- Moins que 18 ans
- 18 ans
- 19 ans
- 20 ans
- 21 ans
- 22 ans
- 23 ans
- 24 ans
- 25 ans
- Plus que 25 ans

39) Vous pouvez être un membre d'un ou plusieurs groupes ethniques ou culturels de la liste suivante. Quels sont vos origines culturelles ou ethniques?

- Blanc
- Asiatique-sud (ex. est-Indienne, Pakistanaise, Sri Lankan etc.)
- Chinoise
- Noire
- Philippine
- Latino-Américaine
- Arabe
- Asiatique sud-est (ex : Vietnamienne, Cambodgienne, Malaysienne, Laotienne etc.)
- Asiatique-ouest (ex : Iranienne, Afghane etc.)
- Coréenne
- Japonaise
- Aborigène (inclut Première Nation/Inuit/Métis)
- Autre (SVP spécifiez : \_\_\_\_\_ )

40) Avant de commencer vos études à l'Université d'Ottawa, où viviez-vous?

- Alberta
- Colombie-Britannique
- Manitoba
- Nouveau Brunswick
- Terre Neuve et Labrador
- Nouvelle-Écosse
- Ontario

- Ile-du-Prince Édouard
- Québec
- Saskatchewan
- Territoires du Nord-Ouest
- Nunavut
- Yukon
- Autre pays (SVP spécifiez : \_\_\_\_\_ )

41) SVP indiquez la réponse qui correspond le mieux à votre assurance maladie, autre que celle fourni par la province (OHIP, RAMQ).

- Je suis couverte par le régime d'assurance maladie de mon(mes) parent(s) ou mon tuteur.
- Je suis couverte par le régime d'assurance maladie de l'université.
- J'ai mon propre régime d'assurance maladie privée.
- Je suis couverte par le régime d'assurance maladie de mon époux.
- Je n'ai pas de régime d'assurance maladie.

42) Avez-vous déjà eu des rapports sexuels (oraux, vaginaux ou anaux) avec un homme?

- Oui
- Non

43) Avez-vous déjà eu un test de Papanicolaou?

- Oui, plus d'une fois.
- Oui, une fois.
- Non
- Je ne sais pas.

44) Avez-vous déjà eu un test de Papanicolaou anormal?

- Oui
- Non
- Je ne sais pas.

45) Êtes-vous à jour dans vos vaccins réguliers (ex. avez-vous reçu vos vaccins de rappel)?

- Oui
- Non
- Je ne sais pas.

46) Est-ce que vous utilisez une sorte de contrôle des naissances/contraception?

- Oui
- Non

47) Est-ce qu'un professionnel de la santé vous avez déjà dit que vous aviez une infection par le VPH?

- Oui
- Non

48) Est-ce qu'un professionnel de la santé vous avez déjà dit que vous aviez une IST (infection sexuellement transmissible) autre que le VPH?

- Oui

- Non
- Je ne sais pas.

49) Êtes-vous nées au Canada?

- Oui
- Non
